# Supplementary material
Source: PubMed Central journal article supplement (PMC4935923)
Supplement: NIHMS793128-supplement-1.pdf [file NIHMS793128-supplement-1.pdf]

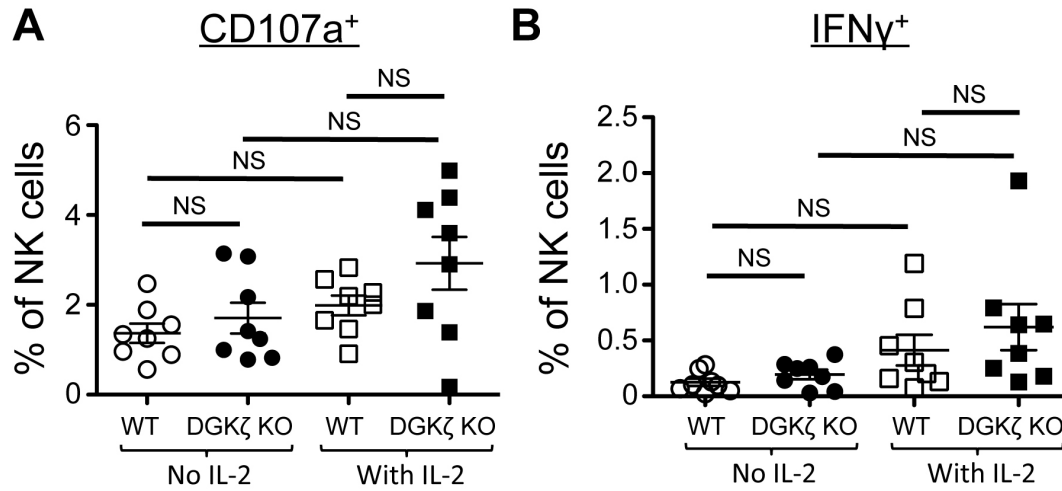

**Supplementary Figure 1: DGK $\zeta$  KO NK cells do not degranulate or produce IFN $\gamma$  spontaneously or when cultured with IL-2 alone.** A) Splenocytes from WT or DGK $\zeta$  KO mice were cultured in the presence or absence of IL-2 with Brefeldin A and anti-CD107a antibody for 6 hours. The proportion of NK cells (CD3<sup>-</sup>DX5<sup>+</sup>NKp46<sup>+</sup>) labeled with anti-CD107a antibody and B) intracellular anti-IFN $\gamma$  antibody is shown. N=8 from 5 independent experiments. Statistical significance was analyzed by Student's t-test. NS = not significant.

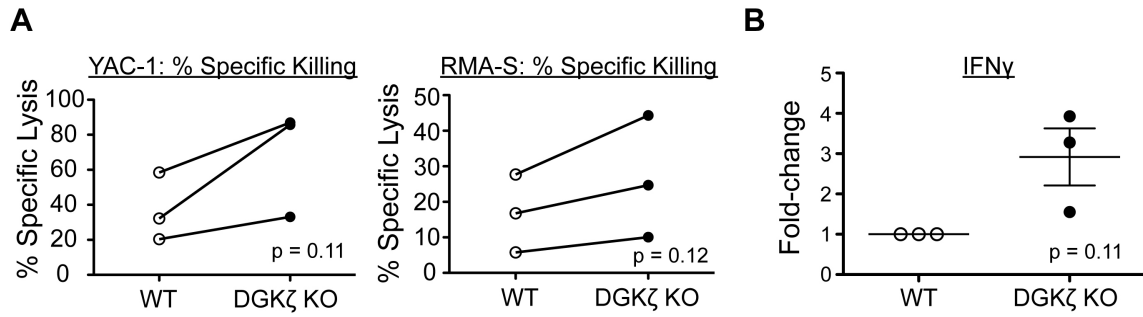

**Supplementary Figure 2: DKGζ KO LAKs are more likely than WT controls to kill targets and produce IFNγ upon co-culture with tumor cell lines.** A) Compiled data from Fig 2B showing % specific killing of each cell line by both WT and DGKζ KO LAKs at the highest effector to target ratios (40:1 for YAC-1, and 20:1 for the RMA-S) are plotted. B) Compiled data from Fig 2C, showing the fold change in IFNγ production by DGKζ KO LAKs as compared to WT controls when challenged with the YAC-1 cell line are plotted. Statistical significance was analyzed by Student's t-test.

**Supplementary Table I:** Inhibitory and activating receptor expression on WT versus DGK  $\zeta$  KO NK cells.

| Receptor | % of WT <sup>a</sup> | % of DGK $\zeta$ KO | P <sup>c</sup> | MFI on WT <sup>b</sup> | MFI on DGK $\zeta$ KO | P  |
|----------|----------------------|---------------------|----------------|------------------------|-----------------------|----|
| Ly49A    | 14 $\pm$ 0.5         | 12 $\pm$ 0.5        | <0.01          | 7383 $\pm$ 282         | 7660 $\pm$ 298        | NS |
| Ly49C    | 48 $\pm$ 0.6         | 43 $\pm$ 0.9        | <0.001         | 2132 $\pm$ 279         | 2297 $\pm$ 371        | NS |
| Ly49I    | 43 $\pm$ 0.9         | 41 $\pm$ 1.3        | NS             | 1418 $\pm$ 45          | 1431 $\pm$ 43         | NS |
| Ly49G2   | 41 $\pm$ 1.1         | 41 $\pm$ 0.5        | NS             | 10860 $\pm$ 465        | 11580 $\pm$ 337       | NS |
| Ly49D    | 58 $\pm$ 0.8         | 56 $\pm$ 0.6        | NS             | 12070 $\pm$ 605        | 13030 $\pm$ 729       | NS |
| Ly49H    | 61 $\pm$ 0.7         | 63 $\pm$ 1.1        | NS             | 2937 $\pm$ 52          | 2992 $\pm$ 70         | NS |
| NKG2D    | 99 $\pm$ 0.03        | 99 $\pm$ 0.06       | NS             | 216 $\pm$ 40           | 209 $\pm$ 61          | NS |
| 2B4      | 99 $\pm$ 0.05        | 94 $\pm$ 1.4        | <0.01          | 697 $\pm$ 89           | 496 $\pm$ 80          | NS |
| NK1.1    | 100                  | 100                 | NS             | 4079 $\pm$ 116         | 3778 $\pm$ 266        | NS |

<sup>a</sup>The percentage of NK cells expressing various NK cell receptors as well as the <sup>b</sup>MFI of the receptor on WT versus DGK  $\zeta$  KO NK cells is shown.

<sup>c</sup>P values were calculated using Student's t-test. NS = Not Significant. N = 7-8 per row, except 2B4, where N = 5-6.
